# Supplementary material
Source: PubMed Central journal article supplement (PMC4382921)
Supplement: NIHMS665823-supplement-01.pdf [file NIHMS665823-supplement-01.pdf]

**Table S1. Basic Mobility Raw Score – Short Form Conversion**

| Summed Raw Score | T Score | Standard Error for T Score |
|------------------|---------|----------------------------|
| 11               | 30.21   | 5.06                       |
| 12               | 34.36   | 3.93                       |
| 13               | 35.56   | 3.89                       |
| 14               | 36.84   | 3.74                       |
| 15               | 37.97   | 3.58                       |
| 16               | 39.31   | 3.18                       |
| 17               | 40.29   | 3.02                       |
| 18               | 41.23   | 2.84                       |
| 19               | 42.09   | 2.67                       |
| 20               | 42.91   | 2.51                       |
| 21               | 43.67   | 2.36                       |
| 22               | 44.39   | 2.22                       |
| 23               | 45.07   | 2.08                       |
| 24               | 45.72   | 1.95                       |
| 25               | 46.33   | 1.84                       |
| 26               | 46.9    | 1.74                       |
| 27               | 47.44   | 1.66                       |
| 28               | 47.95   | 1.6                        |
| 29               | 48.42   | 1.54                       |
| 30               | 48.88   | 1.5                        |
| 31               | 49.32   | 1.48                       |
| 32               | 49.74   | 1.46                       |
| 33               | 50.17   | 1.45                       |
| 34               | 50.58   | 1.44                       |
| 35               | 51      | 1.43                       |
| 36               | 51.41   | 1.44                       |
| 37               | 51.83   | 1.45                       |
| 38               | 52.26   | 1.47                       |
| 39               | 52.7    | 1.48                       |
| 40               | 53.15   | 1.51                       |
| 41               | 53.62   | 1.54                       |
| 42               | 54.1    | 1.59                       |
| 43               | 54.62   | 1.64                       |
| 44               | 55.17   | 1.7                        |
| 45               | 55.77   | 1.79                       |
| 46               | 56.42   | 1.91                       |
| 47               | 57.1    | 2.01                       |
| 48               | 57.88   | 2.15                       |
| 49               | 58.77   | 2.33                       |
| 50               | 60.08   | 2.82                       |
| 51               | 61.02   | 2.93                       |
| 52               | 62.31   | 3.14                       |
| 53               | 64.1    | 3.44                       |
| 54               | 68.47   | 4.96                       |

**Table S2. Self-care Raw Score – Short Form Conversion (Tetraplegia)**

| Summed Raw Score | T Score | Standard Error for T Score |
|------------------|---------|----------------------------|
| 11               | 27.75   | 5.2                        |
| 12               | 31.53   | 4.54                       |
| 13               | 29.78   | 5.28                       |
| 14               | 29.49   | 5.1                        |
| 15               | 30.49   | 4.46                       |
| 16               | 34.14   | 3.26                       |
| 17               | 34.93   | 3.2                        |
| 18               | 35.6    | 3.15                       |
| 19               | 36.54   | 2.96                       |
| 20               | 37.98   | 2.44                       |
| 21               | 38.71   | 2.35                       |
| 22               | 39.51   | 2.22                       |
| 23               | 40.25   | 2.1                        |
| 24               | 40.96   | 1.99                       |
| 25               | 41.6    | 1.92                       |
| 26               | 42.22   | 1.84                       |
| 27               | 42.82   | 1.78                       |
| 28               | 43.38   | 1.73                       |
| 29               | 43.93   | 1.69                       |
| 30               | 44.45   | 1.66                       |
| 31               | 44.96   | 1.63                       |
| 32               | 45.46   | 1.6                        |
| 33               | 45.95   | 1.58                       |
| 34               | 46.44   | 1.56                       |
| 35               | 46.92   | 1.55                       |
| 36               | 47.39   | 1.54                       |
| 37               | 47.87   | 1.53                       |
| 38               | 48.34   | 1.52                       |
| 39               | 48.82   | 1.52                       |
| 40               | 49.3    | 1.52                       |
| 41               | 49.78   | 1.52                       |
| 42               | 50.28   | 1.54                       |
| 43               | 50.78   | 1.55                       |
| 44               | 51.29   | 1.57                       |
| 45               | 51.82   | 1.6                        |
| 46               | 52.37   | 1.65                       |
| 47               | 52.96   | 1.71                       |
| 48               | 53.57   | 1.76                       |
| 49               | 54.25   | 1.86                       |
| 50               | 55.01   | 2                          |
| 51               | 56.05   | 2.5                        |
| 52               | 56.65   | 2.29                       |
| 53               | 57.83   | 2.53                       |
| 54               | 59.36   | 2.8                        |
| 55               | 64.71   | 5.03                       |

**Table S3. Self-care Raw Score – Short Form Conversion (Paraplegia)**

| Summed Raw Score | T Score | Standard Error for T Score |
|------------------|---------|----------------------------|
| 10               | 35.44   | 4.99                       |
| 11               | 40.86   | 2.5                        |
| 12               | 41.96   | 2.39                       |
| 13               | 43.14   | 2.14                       |
| 14               | 44.03   | 1.96                       |
| 15               | 44.86   | 1.75                       |
| 16               | 45.52   | 1.65                       |
| 17               | 46.12   | 1.56                       |
| 18               | 46.65   | 1.5                        |
| 19               | 47.14   | 1.45                       |
| 20               | 47.61   | 1.41                       |
| 21               | 48.04   | 1.37                       |
| 22               | 48.45   | 1.33                       |
| 23               | 48.83   | 1.3                        |
| 24               | 49.20   | 1.29                       |
| 25               | 49.56   | 1.28                       |
| 26               | 49.91   | 1.27                       |
| 27               | 50.26   | 1.26                       |
| 28               | 50.59   | 1.23                       |
| 29               | 50.92   | 1.22                       |
| 30               | 51.23   | 1.22                       |
| 31               | 51.55   | 1.24                       |
| 32               | 51.88   | 1.25                       |
| 33               | 52.22   | 1.26                       |
| 34               | 52.55   | 1.25                       |
| 35               | 52.88   | 1.25                       |
| 36               | 53.21   | 1.26                       |
| 37               | 53.55   | 1.28                       |
| 38               | 53.91   | 1.31                       |
| 39               | 54.28   | 1.34                       |
| 40               | 54.67   | 1.37                       |
| 41               | 55.08   | 1.4                        |
| 42               | 55.52   | 1.45                       |
| 43               | 55.99   | 1.51                       |
| 44               | 56.51   | 1.6                        |
| 45               | 57.11   | 1.71                       |
| 46               | 57.90   | 2                          |
| 47               | 58.51   | 2.02                       |
| 48               | 59.50   | 2.22                       |
| 49               | 60.80   | 2.46                       |
| 50               | 65.84   | 4.78                       |

**Table S4. Fine Motor Raw Score – Short Form Conversion (Tetraplegia)**

| Summed Raw Score | T Score | Standard Error for T Score |
|------------------|---------|----------------------------|
| 10               | 28.6    | 4.52                       |
| 11               | 32.41   | 3.17                       |
| 12               | 33.70   | 3.00                       |
| 13               | 35.03   | 2.75                       |
| 14               | 36.15   | 2.48                       |
| 15               | 37.05   | 2.30                       |
| 16               | 37.84   | 2.16                       |
| 17               | 38.58   | 2.03                       |
| 18               | 39.25   | 1.92                       |
| 19               | 39.86   | 1.83                       |
| 20               | 40.43   | 1.75                       |
| 21               | 40.98   | 1.69                       |
| 22               | 41.49   | 1.63                       |
| 23               | 41.99   | 1.57                       |
| 24               | 42.47   | 1.52                       |
| 25               | 42.93   | 1.48                       |
| 26               | 43.38   | 1.45                       |
| 27               | 43.83   | 1.42                       |
| 28               | 44.26   | 1.39                       |
| 29               | 44.69   | 1.36                       |
| 30               | 45.10   | 1.34                       |
| 31               | 45.51   | 1.34                       |
| 32               | 45.93   | 1.34                       |
| 33               | 46.35   | 1.33                       |
| 34               | 46.77   | 1.32                       |
| 35               | 47.18   | 1.32                       |
| 36               | 47.61   | 1.34                       |
| 37               | 48.05   | 1.36                       |
| 38               | 48.51   | 1.38                       |
| 39               | 48.98   | 1.40                       |
| 40               | 49.48   | 1.45                       |
| 41               | 50.02   | 1.51                       |
| 42               | 50.61   | 1.60                       |
| 43               | 51.26   | 1.69                       |
| 44               | 52.03   | 1.86                       |
| 45               | 52.99   | 2.31                       |
| 46               | 53.70   | 2.23                       |
| 47               | 54.86   | 2.46                       |
| 48               | 56.39   | 2.67                       |
| 49               | 62.58   | 5.33                       |

**Table S5. Fine Motor Raw Score – Short Form Conversion (Paraplegia)**

| Summed Raw Score | T Score | Standard Error for T Score |
|------------------|---------|----------------------------|
| 11               | 33.44   | 4.72                       |
| 12               | 38.32   | 2.56                       |
| 13               | 39.17   | 2.48                       |
| 14               | 40.18   | 2.29                       |
| 15               | 40.95   | 2.22                       |
| 16               | 41.90   | 1.74                       |
| 17               | 42.51   | 1.64                       |
| 18               | 43.08   | 1.54                       |
| 19               | 43.59   | 1.46                       |
| 20               | 44.06   | 1.38                       |
| 21               | 44.48   | 1.31                       |
| 22               | 44.86   | 1.27                       |
| 23               | 45.23   | 1.25                       |
| 24               | 45.60   | 1.25                       |
| 25               | 45.96   | 1.23                       |
| 26               | 46.30   | 1.20                       |
| 27               | 46.62   | 1.17                       |
| 28               | 46.93   | 1.15                       |
| 29               | 47.24   | 1.16                       |
| 30               | 47.55   | 1.19                       |
| 31               | 47.88   | 1.20                       |
| 32               | 48.21   | 1.20                       |
| 33               | 48.53   | 1.19                       |
| 34               | 48.84   | 1.18                       |
| 35               | 49.15   | 1.19                       |
| 36               | 49.47   | 1.22                       |
| 37               | 49.81   | 1.26                       |
| 38               | 50.17   | 1.28                       |
| 39               | 50.54   | 1.31                       |
| 40               | 50.91   | 1.33                       |
| 41               | 51.30   | 1.37                       |
| 42               | 51.71   | 1.42                       |
| 43               | 52.15   | 1.49                       |
| 44               | 52.62   | 1.56                       |
| 45               | 53.12   | 1.64                       |
| 46               | 53.67   | 1.75                       |
| 47               | 54.30   | 1.91                       |
| 48               | 54.95   | 2.04                       |
| 49               | 55.72   | 2.21                       |
| 50               | 56.72   | 2.49                       |
| 51               | 58.91   | 3.73                       |
| 52               | 58.77   | 3.48                       |
| 53               | 59.74   | 3.57                       |
| 54               | 60.99   | 3.63                       |
| 55               | 65.70   | 5.21                       |

**Table S6. Ambulation Raw Score – Short Form Conversion**

| Raw Score | T-Score | Stand Error for T-Score |
|-----------|---------|-------------------------|
| 11        | 43.80   | 6.86                    |
| 12        | 52.51   | 3.19                    |
| 13        | 53.01   | 3.19                    |
| 14        | 53.70   | 3.13                    |
| 15        | 54.87   | 2.89                    |
| 16        | 56.24   | 2.21                    |
| 17        | 56.84   | 2.13                    |
| 18        | 57.49   | 2.01                    |
| 19        | 58.14   | 1.85                    |
| 20        | 58.70   | 1.74                    |
| 21        | 59.19   | 1.67                    |
| 22        | 59.68   | 1.59                    |
| 23        | 60.14   | 1.51                    |
| 24        | 60.56   | 1.45                    |
| 25        | 60.97   | 1.40                    |
| 26        | 61.37   | 1.36                    |
| 27        | 61.76   | 1.32                    |
| 28        | 62.14   | 1.28                    |
| 29        | 62.50   | 1.23                    |
| 30        | 62.84   | 1.19                    |
| 31        | 63.17   | 1.17                    |
| 32        | 63.50   | 1.18                    |
| 33        | 63.84   | 1.19                    |
| 34        | 64.19   | 1.18                    |
| 35        | 64.54   | 1.16                    |
| 36        | 64.87   | 1.13                    |
| 37        | 65.19   | 1.12                    |
| 38        | 65.51   | 1.14                    |
| 39        | 65.87   | 1.17                    |
| 40        | 66.24   | 1.18                    |
| 41        | 66.63   | 1.16                    |
| 42        | 67.00   | 1.14                    |
| 43        | 67.37   | 1.15                    |
| 44        | 67.78   | 1.20                    |
| 45        | 68.23   | 1.23                    |
| 46        | 68.70   | 1.23                    |
| 47        | 69.18   | 1.23                    |
| 48        | 69.68   | 1.29                    |
| 49        | 70.26   | 1.36                    |
| 50        | 70.91   | 1.41                    |
| 51        | 71.62   | 1.49                    |
| 52        | 72.49   | 1.60                    |
| 53        | 73.61   | 1.76                    |
| 54        | 75.24   | 2.04                    |
| 55        | 78.91   | 3.29                    |

**Table S7. Manual Wheelchair Raw Score – Short Form Conversion**

| Summed Raw Score | T Score | Standard Error for T Score |
|------------------|---------|----------------------------|
| 10               | 31.3    | 4.75                       |
| 11               | 35.78   | 3.18                       |
| 12               | 36.92   | 3.11                       |
| 13               | 37.99   | 3.00                       |
| 14               | 39.07   | 2.82                       |
| 15               | 40.21   | 2.52                       |
| 16               | 41.07   | 2.41                       |
| 17               | 41.89   | 2.31                       |
| 18               | 42.68   | 2.22                       |
| 19               | 43.42   | 2.14                       |
| 20               | 44.13   | 2.09                       |
| 21               | 44.80   | 2.04                       |
| 22               | 45.46   | 2.00                       |
| 23               | 46.09   | 1.97                       |
| 24               | 46.71   | 1.95                       |
| 25               | 47.32   | 1.93                       |
| 26               | 47.92   | 1.91                       |
| 27               | 48.52   | 1.91                       |
| 28               | 49.11   | 1.90                       |
| 29               | 49.70   | 1.90                       |
| 30               | 50.28   | 1.90                       |
| 31               | 50.87   | 1.91                       |
| 32               | 51.46   | 1.92                       |
| 33               | 52.06   | 1.93                       |
| 34               | 52.66   | 1.95                       |
| 35               | 53.27   | 1.98                       |
| 36               | 53.89   | 2.00                       |
| 37               | 54.52   | 2.04                       |
| 38               | 55.17   | 2.08                       |
| 39               | 55.83   | 2.12                       |
| 40               | 56.52   | 2.18                       |
| 41               | 57.25   | 2.25                       |
| 42               | 58.01   | 2.33                       |
| 43               | 58.81   | 2.41                       |
| 44               | 59.69   | 2.52                       |
| 45               | 60.66   | 2.65                       |
| 46               | 61.88   | 2.96                       |
| 47               | 62.95   | 3.06                       |
| 48               | 64.37   | 3.27                       |
| 49               | 66.01   | 3.46                       |
| 50               | 70.2    | 4.77                       |

**Table S8. Power Wheelchair Raw Score – Short Form Conversion (Tetraplegia)**

| Summed Raw Score | T Score | Standard Error for T Score |
|------------------|---------|----------------------------|
| 10               | 21.16   | 5.18                       |
| 11               | 23.27   | 5.19                       |
| 12               | 23.62   | 5.11                       |
| 13               | 24.55   | 5.12                       |
| 14               | 26.10   | 5.23                       |
| 15               | 27.32   | 5.02                       |
| 16               | 28.13   | 4.9                        |
| 17               | 29.23   | 4.77                       |
| 18               | 30.66   | 4.65                       |
| 19               | 31.57   | 4.60                       |
| 20               | 32.32   | 4.44                       |
| 21               | 33.27   | 4.26                       |
| 22               | 34.44   | 4.07                       |
| 23               | 35.50   | 4.02                       |
| 24               | 36.18   | 3.92                       |
| 25               | 37.02   | 3.76                       |
| 26               | 38.07   | 3.54                       |
| 27               | 39.33   | 3.28                       |
| 28               | 40.08   | 3.22                       |
| 29               | 40.87   | 3.14                       |
| 30               | 41.70   | 3.02                       |
| 31               | 42.60   | 2.86                       |
| 32               | 43.34   | 2.80                       |
| 33               | 44.11   | 2.73                       |
| 34               | 44.85   | 2.68                       |
| 35               | 45.57   | 2.62                       |
| 36               | 46.29   | 2.60                       |
| 37               | 47.02   | 2.58                       |
| 38               | 47.75   | 2.58                       |
| 39               | 48.42   | 2.56                       |
| 40               | 49.16   | 2.59                       |
| 41               | 49.93   | 2.64                       |
| 42               | 50.79   | 2.80                       |
| 43               | 51.40   | 2.73                       |
| 44               | 52.30   | 2.84                       |
| 45               | 53.34   | 3.02                       |
| 46               | 55.27   | 4.00                       |
| 47               | 55.03   | 3.38                       |
| 48               | 56.32   | 3.62                       |
| 49               | 58.02   | 3.87                       |
| 50               | 63.25   | 5.55                       |

**Table S9. Power Wheelchair Raw Score – Short Form Conversion (Paraplegia)**

| Summed Raw Score | T Score | Standard Error for T Score |
|------------------|---------|----------------------------|
| 10               | 25.64   | 5.56                       |
| 11               | 28.71   | 5.28                       |
| 12               | 28.65   | 5.15                       |
| 13               | 29.40   | 4.89                       |
| 14               | 31.56   | 4.52                       |
| 15               | 33.48   | 4.35                       |
| 16               | 33.98   | 4.26                       |
| 17               | 34.72   | 4.08                       |
| 18               | 35.81   | 3.79                       |
| 19               | 37.76   | 3.24                       |
| 20               | 38.48   | 3.19                       |
| 21               | 39.24   | 3.11                       |
| 22               | 40.05   | 2.96                       |
| 23               | 41.06   | 2.69                       |
| 24               | 41.73   | 2.61                       |
| 25               | 42.44   | 2.52                       |
| 26               | 43.11   | 2.44                       |
| 27               | 43.75   | 2.36                       |
| 28               | 44.35   | 2.31                       |
| 29               | 44.94   | 2.26                       |
| 30               | 45.50   | 2.22                       |
| 31               | 46.05   | 2.19                       |
| 32               | 46.59   | 2.17                       |
| 33               | 47.12   | 2.16                       |
| 34               | 47.65   | 2.15                       |
| 35               | 48.18   | 2.14                       |
| 36               | 48.71   | 2.15                       |
| 37               | 49.25   | 2.17                       |
| 38               | 49.80   | 2.19                       |
| 39               | 50.33   | 2.21                       |
| 40               | 50.93   | 2.25                       |
| 41               | 51.54   | 2.32                       |
| 42               | 52.23   | 2.45                       |
| 43               | 52.77   | 2.43                       |
| 44               | 53.56   | 2.55                       |
| 45               | 54.44   | 2.71                       |
| 46               | 55.99   | 3.49                       |
| 47               | 55.97   | 3.08                       |
| 48               | 57.18   | 3.28                       |
| 49               | 58.72   | 3.49                       |
| 50               | 63.94   | 5.36                       |
